# Supplementary material for: The Nebulous Association between Cognitive Impairment and Falls in Older Adults: A Systematic Review of the Literature
Source: MDPI journal article supplement (doi:10.3390/ijerph20032628), 2023-02-01
Supplement: s1 [file s1]

# How robust is the association between MCI and falls in older adults ? A systematic review

## Supplementary data

### Search Strategy

#### Research question:

1. Is there an association between falls and cognitive impairment in older people?
2. What are the underlying mechanisms between them?
3. Are there any efficient strategy and recommendation to prevent falls in cognitively impaired older people?

#### Published date:

From January 2011 to August 2021

Because there was already a paper from Muir et al in 2012 for the same topic  
(doi: 10.1093/ageing/afs012)

#### Inclusion criteria:

Older people (aged more than 65 years old)

Original studies

All languages accepted

#### Exclusion criteria:

Review, conference abstract, editorial

#### Target databases:

Embase, Web of science, Medline, CINAHL (+/- google scholar)

#### Keywords that we chose for now (maybe there are others?)

**For Falls:** "falls" OR "fall" OR "falling" OR "injury" OR "gait" OR "gait disorders" OR "balance" OR "gait impairment" OR "balance impairment" OR "fall risk" OR "accidental falls" OR "falling"

**For Cognitive impairment:** "cognitive impairment" OR "dementia" OR "mild cognitive impairment" OR "Alzheimer" OR "vascular dementia" OR "lewy bodies" OR "lewy body" OR "vascular dementia" OR "cognitive defect" OR "cognitive dysfunction" OR "parkinson disease" OR "parkinsonism"

**For Older people:** "older adult" OR "older people" OR "aged" OR "elderly" OR "oldest old" OR "older one" OR "over 85" OR "over 65" OR "aged patient" OR "geriatric patient" OR "aged people" OR "aged person" OR "aged subject" OR "elderly" OR "elderly patient" OR "elderly people" OR "elderly person" OR "elderly subject" OR "senior citizen" OR "senium"
